# Supplementary material
Source: publisher site journal article supplement (https://www.dovepress.com/article/538412)
Supplement: Supplementary file 1 [file Supplementary%20meterial_1_1.docx]

**Supplementary Table S1. Bacterial antimicrobial resistance rate**

| **Gram-negative bacteria** | | | | | **Gram-positive bacteria** | |
| --- | --- | --- | --- | --- | --- | --- |
| **Antibiotics** | ***Acinetobacter***  ***baumannii***  **(n = 127)** | ***Pseudomonas***  ***aeruginosa***  **(n = 57)** | ***Klebsiella***  ***pneumoniae***  **(n = 111)** | ***Escherichia***  ***coli***  **(n = 72)** | **Antibiotics** | ***Staphylococcus***  ***aureus***  **(n = 33)** |
| **Resistance (%)** | **Resistance (%)** | **Resistance (%)** | **Resistance (%)** | **Resistance (%)** |
| Imipenem | 94(74.0) | 19(33.3) | 33(29.7) | 8(11.1) | Penicillin G | 30(90.9) |
| Meropenem | 92(72.4) | 17(29.8) | 34(30.6) | 8(11.1) | Cloxacillin | 14(42.4) |
| Amikacin | 79(62.2) | 20(25.08) | 24(21.6) | 6(8.3) | Gentamicin | 6(18.1) |
| Gentamicin | 93(73.2) | 8(14.0) | 36(32.4) | 28(38.9) | Ciprofloxacin | 7(21.2) |
| Levofloxacin | 92(72.4) | 12(21.1) | 40(36.0) | 30(41.7) | Sulfamethoxazole | 3(9.1) |
| Ciprofloxacin | 88(69.3) | 9(15.8) | 38(34.2） | 32(44.4) | Clindamycin | 8(24.2) |
| Piperacillin | 94(74.0) | 6(10.5) | 39(35.1） | 28(38.9) | Erythromycin | 18(54.5) |
| Ceftazidime | 93(73.2) | 11(19.3) | 37(33.9） | 29(40.3) | Minocycline | 1(0.3) |
| Cefepime | 96(75.6) | 11(19.3) | 38(34.2） | 24(33.3) | **-** | **-** |
| ESBL + | **-** | **-** | 15(13.5） | 16 (22.2) | - | - |

Note: Extended-spectrum β-lactamase-producing strain.
